# Supplementary material for: Metal imidazolate sulphate frameworks as a variation of zeolitic imidazolate frameworks
Source: Royal Society of Chemistry journal article supplement (doi:10.1039/d1cc07046k), 2022-01-01
Supplement: d1cc07046k1.pdf [file d1cc07046k1.pdf]

## *Electronic Supplementary Information*

# **Metal imidazolate sulphate frameworks as a variation of zeolitic imidazolate frameworks**

Kyungkyou Noh,<sup>a</sup> Jaeung Sim,<sup>b</sup> Jonghoon Kim<sup>c</sup> and Jaheon Kim<sup>\*c</sup>

<sup>a</sup> Department of Information Communication Convergence Technology, Soongsil University, Seoul 06978, Republic of Korea.

<sup>b</sup> Department of Fire Safety Research, Korea Institute of Civil Engineering and Building Technology, Hwaseong-Si, Gyeonggi-Do 18544, Republic of Korea.

<sup>c</sup> Department of Chemistry, Soongsil University, Seoul 06978, Republic of Korea; E-mail: jaheon@ssu.ac.kr

## **General Methods**

Zinc sulfate heptahydrate ( $\text{ZnSO}_4 \cdot 7\text{H}_2\text{O}$ ), benzimidazole, and 2-methylimidazole were purchased from Sigma-Aldrich. 2-Ethylimidazole, 2-nitroimidazole, 2-mercaptobenzimidazole, and 1,3-dimethyl-2-imidazolidinone were purchased from Tokyo Chemical Industry (TCI) Co., Ltd. Zinc nitrate hexahydrate ( $\text{Zn}(\text{NO}_3)_2 \cdot 6\text{H}_2\text{O}$ ), nickel nitrate hexahydrate ( $\text{Ni}(\text{NO}_3)_2 \cdot 6\text{H}_2\text{O}$ ), *N,N*-dimethylformamide (DMF), acetonitrile, and dichloromethane were purchased from Daejung Chemicals & Metals Co., Ltd. Before experiments,  $\text{Zn}(\text{NO}_3)_2 \cdot 6\text{H}_2\text{O}$  and  $\text{Ni}(\text{NO}_3)_2 \cdot 6\text{H}_2\text{O}$  were dried under vacuum at ambient temperature for 1 day, and all other reagents were used without further purification.

Powder X-ray diffraction (PXRD) data were collected on a Rigaku MiniFlex diffractometer with  $\text{CuK}\alpha$  radiation ( $\lambda = 1.5418 \text{ \AA}$ ). Single crystal X-ray diffraction (SCXRD) data were collected at 100 or 173 K with synchrotron radiation on a Rayonix MX225HS CCD area detector at BL2D-SMC beamline at Pohang Accelerator laboratory (PAL). Thermogravimetric analyses (TGA) were carried out using a PerkinElmer Pyris 1 in air at a heating rate of  $5^\circ\text{C}/\text{min}$ . Fourier transform infrared (FT-IR) spectra were measured employing a JASCO FT/IR-7400 spectrophotometer and a PerkinElmer FT/IR Spectrum Two spectrometer on samples prepared as KBr pellets.  $^1\text{H}$ -NMR spectra were recorded with a JEOL ECZ500/S1 spectrometer (500 MHz, Jeol, Tokyo, Japan). The  $\text{N}_2$ ,  $\text{H}_2$  and  $\text{CO}_2$  adsorption-desorption isotherms were measured using the standard volumetric procedure on a BELSORP-mini instrument (BEL-Japan, INC.). Methanol adsorption-desorption isotherms were measured using the standard volumetric procedure on a BELSORP-max instrument (BEL-Japan, INC.). Elemental analysis was performed with a Thermo Scientific Flash 2000 HT analyzer. Inductively coupled plasma-atomic emission spectroscopy (ICP-AES) was carried out employing PerkinElmer Optima 7300DV & Avio500. Field emission-scanning electron microscope (FE-SEM) images were obtained using the Carl Zeiss GeminiSEM 300 at 10 kV.

## Synthesis of Compounds

### Synthesis of $[\text{Zn}(\text{SO}_4)_2(\text{HmIm})_2][\text{NH}_2(\text{CH}_3)_2]_2$ (1).

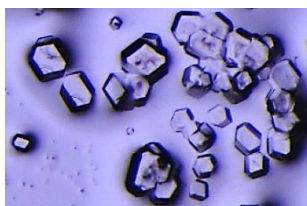

$\text{Zn}(\text{SO}_4) \cdot 7\text{H}_2\text{O}$  (347 mg, 1.2 mmol) and 2-methylimidazole (mImH, 197 mg, 2.4 mmol) were placed in a 30 mL vial, and then 15 mL of DMF and 0.5 mL of  $\text{H}_2\text{O}$  were added. After stirring the reaction mixture at room temperature for 30 minutes, the vial was capped and sealed with Teflon tape, and heated in an oven at  $120^\circ\text{C}$  for 4 days to give colourless block crystals. The collected crystals were washed sequentially with DMF ( $3 \times 10$  mL) and 15 mL of dichloromethane, and dried in air. Yield was 15 % (46 mg) based on 1 mole of zinc sulphate. Elemental microanalysis for  $\text{C}_{12}\text{H}_{28}\text{N}_6\text{O}_8\text{S}_2\text{Zn}$ , calculated (%): C, 28.05; H, 5.49; N, 16.35; S, 12.48. Found (%): C, 26.02; H, 4.63; N, 15.11; S, 11.24.

### Synthesis of $[\text{Zn}(\text{SO}_4)_2(\text{eImH})_2][\text{NH}_2(\text{CH}_3)_2]_2$ (2).

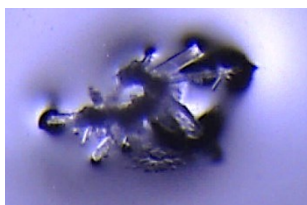

$\text{Zn}(\text{SO}_4) \cdot 7\text{H}_2\text{O}$  (347 mg, 1.2 mmol) and 2-ethylimidazole (eImH, 231 mg, 2.4 mmol) were placed in a 30 mL vial, and then 15 mL of DMF and 0.5 mL of  $\text{H}_2\text{O}$  were added. After stirring the reaction mixture at room temperature for 30 minutes, the vial was capped and sealed with Teflon tape, and heated in an oven at  $120^\circ\text{C}$  for 4 days to give colourless rectangular crystals. The collected crystals were washed sequentially with DMF ( $3 \times 10$  mL) and 15 mL of dichloromethane, and dried in air (317 mg, yield 97 %). Elemental analysis for  $\text{C}_{14}\text{H}_{32}\text{N}_6\text{O}_8\text{S}_2\text{Zn}$ , calculated (%): C, 31.03; H, 5.95; N, 15.51; S, 11.83. Found (%): C, 29.74; H, 5.05; N, 14.20; S, 11.20. FT-IR spectrum is given in Fig. S23.

### Synthesis of $[\text{Zn}_2(\text{SO}_4)_2(\text{BIm})_2][\text{NH}_2(\text{CH}_3)_2]_2$ (MISF-1).

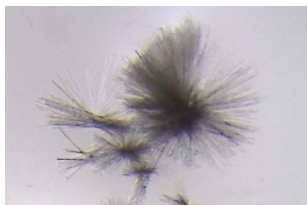

$\text{Zn}(\text{SO}_4) \cdot 7\text{H}_2\text{O}$  (347 mg, 1.2 mmol) and benzimidazole (BImH, 284 mg, 2.4 mmol) were placed in a 30 mL vial, and then 15 mL of DMF and 0.5 mL of  $\text{H}_2\text{O}$  were added. After stirring the reaction mixture at room temperature for 30 minutes, the vial was capped and sealed with Teflon tape, and heated in an oven at  $120^\circ\text{C}$  for 4 days to give colourless needle crystals. The collected crystals were washed sequentially with DMF ( $3 \times 10$  mL) and 15 mL of dichloromethane, and dried in air (340 mg, yield 91 %). Elemental analysis for  $\text{C}_{18}\text{H}_{26}\text{N}_6\text{O}_8\text{S}_2\text{Zn}_2$ , calculated (%): C, 33.30; H, 4.04; N, 12.94; S, 9.87. Found (%): C, 34.21; H, 3.98; N, 12.76; S, 9.97. FT-IR spectrum is given in Fig. S23.

### Synthesis of $[\text{Zn}(\text{SO}_4)(\text{nIm})][\text{NH}_2(\text{CH}_3)_2]$ (MISF-2).

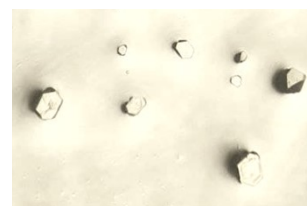

$\text{Zn}(\text{SO}_4) \cdot 7\text{H}_2\text{O}$  (144 mg, 0.5 mmol) and 2-nitroimidazole (nImH, 226 mg, 2.0 mmol) were placed in a 30 mL vial, and then 20 mL of DMF and 1.0 mL of  $\text{H}_2\text{O}$  were added. After stirring the reaction mixture at room temperature for 30 minutes, the vial was capped and sealed with Teflon tape, and heated in an oven at  $120^\circ\text{C}$  for 3 days to give yellow block crystals. The collected crystals were washed sequentially with DMF ( $3 \times 10$  mL) and acetonitrile ( $3 \times 10$  mL), and dried in vacuum for 1 h (46 mg, yield 29 %). Elemental analysis for  $\text{C}_8\text{H}_{12}\text{N}_5\text{O}_6\text{SZn}$ , calculated (%): C, 25.85; H, 3.25; N, 18.84; S, 8.63. Found (%): C, 18.25; H, 3.59; N, 16.10; S, 10.05. FT-IR spectrum is given in Fig. S23.

### Synthesis of $[\text{Zn}_{0.5}(\text{H}_2\text{O})(\text{DMI})][\text{Zn}_3(\text{nIm})_3(\text{SO}_4)_2]$ (**MISF-3**).

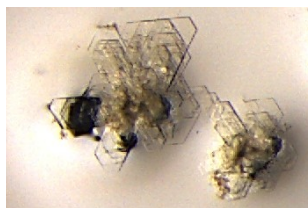

$\text{Zn}(\text{NO}_3)_2 \cdot 6\text{H}_2\text{O}$  (75 mg, 0.25 mmol),  $\text{nImH}$  (57 mg, 0.5 mmol), and 2-mercaptobenzimidazole (150 mg, 1.0 mmol) were placed in a 30 mL vial, and then dissolved completely in 10 mL of 1,3-dimethyl-2-imidazolidinone (DMI). After adding 0.75 mL of  $\text{H}_2\text{O}$  in the solution, the vial was capped and sealed with Teflon tape, and heated in an oven at 120 °C for 4 days to give yellow plate crystals. Due to a low yield (ca. 8 %), the crystals were collected from a total of 10 batches, and washed with DMI ( $3 \times 10$  mL), and dried at 60 °C in vacuum for 10 h. Elemental analysis for evacuated **MISF-3**,  $\text{C}_{14}\text{H}_{18}\text{N}_{11}\text{O}_{16}\text{S}_2\text{Zn}_{3.5}$ , calculated (%): C, 18.91; H, 2.04; N, 17.33; S, 7.21. Found (%): C, 17.45; H, 2.13; N, 15.87; S, 7.07. FT-IR spectrum is given in Fig. S23.

### Preparation of **MISF-3-Ni**.

The activated **MISF-3** crystals (100 mg) at 60 °C for 10 h were immersed in 0.5 M DMI solution of  $\text{Ni}(\text{NO}_3)_2 \cdot 6\text{H}_2\text{O}$  at room temperature for 1 day. The collected crystals were immersed again in the same but fresh DMI solution for 1 day. The filtered crystals were washed with neat DMI ( $3 \times 15$  mL), and further soaked in 15 mL of dichloromethane for 1 day to replace the solvent, and then washed with dichloromethane ( $3 \times 10$  mL) to obtain **MISF-3-Ni**. Finally, **MISF-3-Ni** was heated at 60 °C for 10 hours under vacuum for further analysis. As a result of ICP-AES analysis, Zn was measured to be 322.997 ppm and Ni was measured to be 48.663 ppm, which corresponds to a molar ratio of Zn : Ni = 5.91 : 1. FT-IR spectrum is given in Fig. S23.

## X-Ray Crystallography

A single crystal was attached to an oil-covered CryoLoop on a goniometer head. Under liquid nitrogen stream, the crystal was mounted on a Bruker diffractometer with an ADSC Q210 CCD area detector at 2D SMC with a silicon (111) double-crystal monochromator at Pohang Accelerator laboratory (PAL). The wavelength of the X-ray generated by PLSII 2D bending magnets was adjusted to  $\lambda = 0.630$  Å (**MISF-1**) or 0.700 Å (**1**, **2**, **MISF-2**, and **MISF-3**). Data collection was conducted by an omega-scan method at 100 K except for **MISF-3** (173 K). Over the range of the omega angle, 180°, diffraction images were collected with a step increase of 1° and an exposure time of 1 sec per frame at a detector distance 90.00 mm, which was controlled using the PAL ADSC Quantum-210 ADX Program.<sup>S1</sup> The HKL3000sm (Ver. 703r) software package<sup>S2</sup> was used for the refinement of unit cell parameters, and data reduction with a higher symmetric unit cell. Absorption corrections were applied to all crystal data but seemed not to be effective for **MISF-1** that has thin needle morphology; thus, the eight large residual peaks ( $2.06 \sim 2.65 \text{ eÅ}^{-3}$ ) around two Zn atoms in **MISF-1** are ascribed to the insufficient absorption correction. The structure was solved by direct methods using the SHELX-S program and further developed with difference Fourier syntheses and subsequent refinement processes using the SHELX-L Version 2018/3.<sup>S3</sup> All non-H atoms were refined anisotropically except for those of the dimethylammonium cation of **MISF-2**. Hydrogen atoms were generated and included at ideal positions using the AIFX command in SHELX-L. Due to severe disorder of the dimethylammonium ion in **MISF-2**, a proper disordered model was not able to be applied and thus its N and C atoms were refined

isotropically under geometry restraints using DFIX. In contrast, the disorder of the coordinated sulphate ion to a Zn atom could be resolved and its atoms were refined anisotropically. In addition, the structural refinement of **MISF-2** could be conducted smoothly using TWIN and BASF instructions. In the case of **MISF-3**, a DMI solvent molecule was found in pores and refined anisotropically but with many SHELX restraints instructions (DFIX, SADI, ISOR) because of a large thermal motion. Additionally, one of the coordinated DMI to Zn4 had large and elongated thermal ellipsoids, but its possible disorder model was not further investigated to make a simpler structural model.

The CIF files for **1**, **2**, **MISF-1**, **MISF-2**, and **MISF-3** were deposited as CCDC 2128435-2128439 which can be obtained free of charge from the Cambridge Crystallographic Data Centre via [www.ccdc.cam.ac.uk/structures/](http://www.ccdc.cam.ac.uk/structures/).

### References

- S1. A. J. Arvai, C. Nielsen, ADSC Quantum-210 ADX Program, Area Detector System Corporation; Poway, CA, USA, **1983**.
- S2. Z. Otwinowski, W. Minor, *Methods in Enzymology*, ed. C. W. Carter, Jr., R. M. Sweet, Academic Press, New York, 1997, vol. 276, part A, pp. 307.
- S3. Sheldrick, G.M. *Acta Cryst.* **2008**, *A64*, 112.

**Table S1.** Crystal data and refinement results for **1**

|                                 |                                                                                 |                     |
|---------------------------------|---------------------------------------------------------------------------------|---------------------|
| Empirical formula               | C <sub>12</sub> H <sub>28</sub> N <sub>6</sub> O <sub>8</sub> S <sub>2</sub> Zn |                     |
| Formula weight                  | 513.89                                                                          |                     |
| Temperature                     | 100(2) K                                                                        |                     |
| Wavelength                      | 0.700 Å                                                                         |                     |
| Crystal system                  | Orthorhombic                                                                    |                     |
| Space group                     | <i>Pca</i> 2 <sub>1</sub> (No. 29)                                              |                     |
| Unit cell dimensions            | <i>a</i> = 14.426(3) Å                                                          | $\alpha = 90^\circ$ |
|                                 | <i>b</i> = 10.493(2) Å                                                          | $\beta = 90^\circ$  |
|                                 | <i>c</i> = 14.810(3) Å                                                          | $\gamma = 90^\circ$ |
| Volume                          | 2241.8(8) Å <sup>3</sup>                                                        |                     |
| Z                               | 4                                                                               |                     |
| Density (calculated)            | 1.523 g/cm <sup>3</sup>                                                         |                     |
| Absorption coefficient          | 1.280 mm <sup>-1</sup>                                                          |                     |
| F(000)                          | 1072                                                                            |                     |
| Crystal size                    | 0.050 x 0.016 x 0.006 mm <sup>3</sup>                                           |                     |
| Theta range for data collection | 2.364 to 27.816.                                                                |                     |
| Index ranges                    | -19 ≤ <i>h</i> ≤ 19, -13 ≤ <i>k</i> ≤ 13, -19 ≤ <i>l</i> ≤ 19                   |                     |
| Reflections collected           | 15716                                                                           |                     |
| Independent reflections         | 5404 [R(int) = 0.0849]                                                          |                     |
| Completeness to theta = 24.835  | 99.9 %                                                                          |                     |
| Absorption correction           | Empirical                                                                       |                     |
| Max. and min. transmission      | 1.000 and 0.917                                                                 |                     |
| Refinement method               | Full-matrix least-squares on F <sup>2</sup>                                     |                     |
| Data / restraints / parameters  | 5404 / 1 / 268                                                                  |                     |
| Goodness-of-fit on F2           | 1.146                                                                           |                     |
| Final R indices [I > 2σ(I)]     | R1 = 0.0446, wR2 = 0.1327                                                       |                     |
| R indices (all data)            | R1 = 0.0469, wR2 = 0.1341                                                       |                     |
| Absolute structure parameter    | 0.022(8)                                                                        |                     |
| Extinction coefficient          | n/a                                                                             |                     |
| Largest diff. peak and hole     | 1.456 and -1.558 e.Å <sup>-3</sup>                                              |                     |

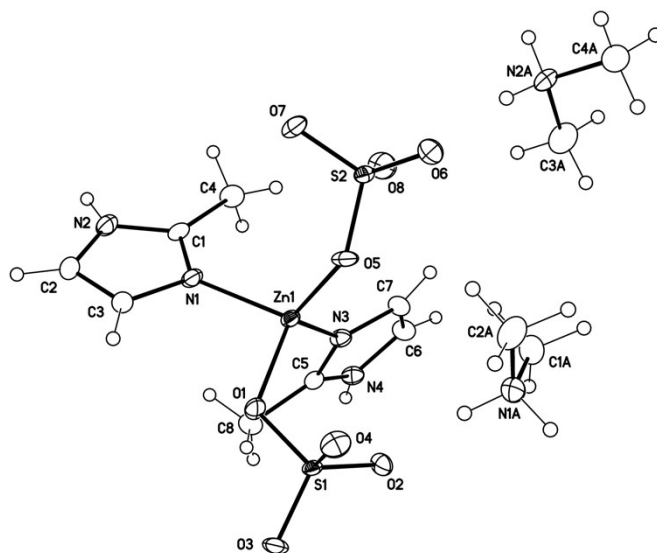**Figure S1.** An ORTEP drawing of the asymmetric unit of **1**. The thermal ellipsoids are displayed with 50% probability level.

**Table S2.** Crystal data and refinement results for **2**

|                                 |                                                                                 |                     |
|---------------------------------|---------------------------------------------------------------------------------|---------------------|
| Empirical formula               | C <sub>14</sub> H <sub>32</sub> N <sub>6</sub> O <sub>8</sub> S <sub>2</sub> Zn |                     |
| Formula weight                  | 541.94                                                                          |                     |
| Temperature                     | 100(2) K                                                                        |                     |
| Wavelength                      | 0.700 Å                                                                         |                     |
| Crystal system                  | Orthorhombic                                                                    |                     |
| Space group                     | <i>Pca</i> 2 <sub>1</sub> (No. 29)                                              |                     |
| Unit cell dimensions            | <i>a</i> = 14.624(3) Å                                                          | $\alpha = 90^\circ$ |
|                                 | <i>b</i> = 10.424(2) Å                                                          | $\beta = 90^\circ$  |
|                                 | <i>c</i> = 15.046(3) Å                                                          | $\gamma = 90^\circ$ |
| Volume                          | 2293.6(8) Å <sup>3</sup>                                                        |                     |
| Z                               | 4                                                                               |                     |
| Density (calculated)            | 1.569 g/cm <sup>3</sup>                                                         |                     |
| Absorption coefficient          | 0.938 mm <sup>-1</sup>                                                          |                     |
| F(000)                          | 1136                                                                            |                     |
| Crystal size                    | 0.090 x 0.070 x 0.030 mm <sup>3</sup>                                           |                     |
| Theta range for data collection | 1.732 to 24.826.                                                                |                     |
| Index ranges                    | -19 ≤ <i>h</i> ≤ 19, -13 ≤ <i>k</i> ≤ 13, -19 ≤ <i>l</i> ≤ 19                   |                     |
| Reflections collected           | 16686                                                                           |                     |
| Independent reflections         | 5516 [R(int) = 0.0654]                                                          |                     |
| Completeness to theta = 22.210  | 99.4 %                                                                          |                     |
| Absorption correction           | Empirical                                                                       |                     |
| Max. and min. transmission      | 1.000 and 0.476                                                                 |                     |
| Refinement method               | Full-matrix least-squares on F <sup>2</sup>                                     |                     |
| Data / restraints / parameters  | 5516 / 1 / 287                                                                  |                     |
| Goodness-of-fit on F2           | 1.020                                                                           |                     |
| Final R indices [I > 2σ(I)]     | R1 = 0.0308, wR2 = 0.0836                                                       |                     |
| R indices (all data)            | R1 = 0.0309, wR2 = 0.0837                                                       |                     |
| Absolute structure parameter    | 0.014(6)                                                                        |                     |
| Extinction coefficient          | 0.0050(9)                                                                       |                     |
| Largest diff. peak and hole     | 0.629 and -0.553 e.Å <sup>-3</sup>                                              |                     |

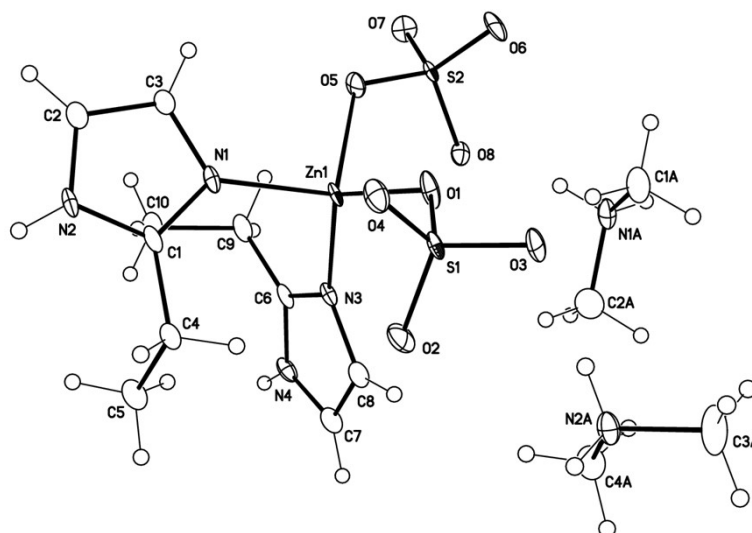**Figure S2.** An ORTEP drawing of the asymmetric unit of **2**. The thermal ellipsoids are displayed at 50% probability level.

**Table S3.** Crystal data and refinement results for **MISF-1**

|                                   |                                                                                                |                     |
|-----------------------------------|------------------------------------------------------------------------------------------------|---------------------|
| Empirical formula                 | C <sub>36</sub> H <sub>52</sub> N <sub>12</sub> O <sub>16</sub> S <sub>4</sub> Zn <sub>4</sub> |                     |
| Formula weight                    | 1298.61                                                                                        |                     |
| Temperature                       | 100(2) K                                                                                       |                     |
| Wavelength                        | 0.630 Å                                                                                        |                     |
| Crystal system                    | Orthorhombic                                                                                   |                     |
| Space group                       | <i>Pca</i> 2 <sub>1</sub> (No. 29)                                                             |                     |
| Unit cell dimensions              | <i>a</i> = 9.7390(19) Å                                                                        | $\alpha = 90^\circ$ |
|                                   | <i>b</i> = 22.092(4) Å                                                                         | $\beta = 90^\circ$  |
|                                   | <i>c</i> = 11.364(2) Å                                                                         | $\gamma = 90^\circ$ |
| Volume                            | 2445.0(8) Å <sup>3</sup>                                                                       |                     |
| Z                                 | 2                                                                                              |                     |
| Density (calculated)              | 1.764 g/cm <sup>3</sup>                                                                        |                     |
| Absorption coefficient            | 1.573 mm <sup>-1</sup>                                                                         |                     |
| F(000)                            | 1328                                                                                           |                     |
| Crystal size                      | 0.140 x 0.031 x 0.009 mm <sup>3</sup>                                                          |                     |
| Theta range for data collection   | 1.634 to 24.834°                                                                               |                     |
| Index ranges                      | -12 ≤ <i>h</i> ≤ 12, -29 ≤ <i>k</i> ≤ 29, -15 ≤ <i>l</i> ≤ 14                                  |                     |
| Reflections collected             | 18075                                                                                          |                     |
| Independent reflections           | 5901 [R(int) = 0.0958]                                                                         |                     |
| Completeness to theta = 22.210°   | 99.7 %                                                                                         |                     |
| Absorption correction             | Empirical                                                                                      |                     |
| Max. and min. transmission        | 1.000 and 0.670                                                                                |                     |
| Refinement method                 | Full-matrix least-squares on F <sup>2</sup>                                                    |                     |
| Data / restraints / parameters    | 5901 / 1 / 355                                                                                 |                     |
| Goodness-of-fit on F <sup>2</sup> | 1.053                                                                                          |                     |
| Final R indices [I > 2σ(I)]       | R1 = 0.0560, wR2 = 0.1468                                                                      |                     |
| R indices (all data)              | R1 = 0.0582, wR2 = 0.1487                                                                      |                     |
| Absolute structure parameter      | 0.011(15)                                                                                      |                     |
| Extinction coefficient            | n/a                                                                                            |                     |
| Largest diff. peak and hole       | 2.653 and -1.836 e.Å <sup>-3</sup>                                                             |                     |

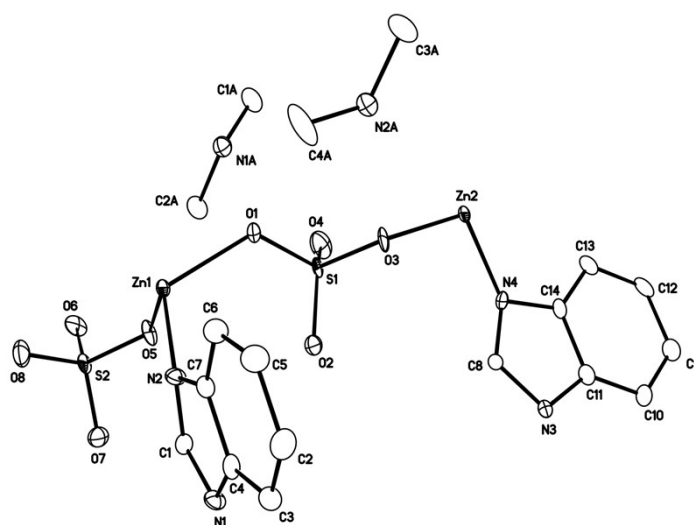**Figure S3.** An ORTEP drawing of the asymmetric unit of **MISF-1**. The thermal ellipsoids are displayed at 50% probability level. Hydrogen atoms are not shown for simplicity.

**Table S4.** Crystal data and refinement results for **MISF-2**

|                                   |                                                                   |                     |
|-----------------------------------|-------------------------------------------------------------------|---------------------|
| Empirical formula                 | C <sub>5</sub> H <sub>10</sub> N <sub>4</sub> O <sub>6</sub> S Zn |                     |
| Formula weight                    | 319.62                                                            |                     |
| Temperature                       | 100 (2) K                                                         |                     |
| Wavelength                        | 0.700 Å                                                           |                     |
| Crystal system                    | Tetragonal                                                        |                     |
| Space group                       | <i>I</i> 4 <sub>1</sub> / <i>a</i> (No. 88)                       |                     |
| Unit cell dimensions              | <i>a</i> = 15.217(2) Å                                            | $\alpha = 90^\circ$ |
|                                   | <i>b</i> = 15.217(2) Å                                            | $\beta = 90^\circ$  |
|                                   | <i>c</i> = 20.632(4) Å                                            | $\gamma = 90^\circ$ |
| Volume                            | 4777.5(14) Å <sup>3</sup>                                         |                     |
| Z                                 | 16                                                                |                     |
| Density (calculated)              | 1.777 g/cm <sup>3</sup>                                           |                     |
| Absorption coefficient            | 2.168 mm <sup>-1</sup>                                            |                     |
| F(000)                            | 2592                                                              |                     |
| Crystal size                      | 0.070 x 0.060 x 0.030 mm <sup>3</sup>                             |                     |
| Theta range for data collection   | 1.638 to 29.992°                                                  |                     |
| Index ranges                      | -21 ≤ <i>h</i> ≤ 21, -15 ≤ <i>k</i> ≤ 15, -29 ≤ <i>l</i> ≤ 29     |                     |
| Reflections collected             | 6972                                                              |                     |
| Independent reflections           | 3646 [R(int) = 0.0165]                                            |                     |
| Completeness to theta = 24.835°   | 99.9 %                                                            |                     |
| Absorption correction             | Empirical                                                         |                     |
| Max. and min. transmission        | 1.000 and 0.388                                                   |                     |
| Refinement method                 | Full-matrix least-squares on F <sup>2</sup>                       |                     |
| Data / restraints / parameters    | 3646 / 14 / 167                                                   |                     |
| Goodness-of-fit on F <sup>2</sup> | 1.088                                                             |                     |
| Final R indices [I > 2σ(I)]       | R1 = 0.0554, wR2 = 0.1543                                         |                     |
| R indices (all data)              | R1 = 0.0566, wR2 = 0.1556                                         |                     |
| Extinction coefficient            | n/a                                                               |                     |
| Largest diff. peak and hole       | 1.168 and -1.147 e.Å <sup>-3</sup>                                |                     |

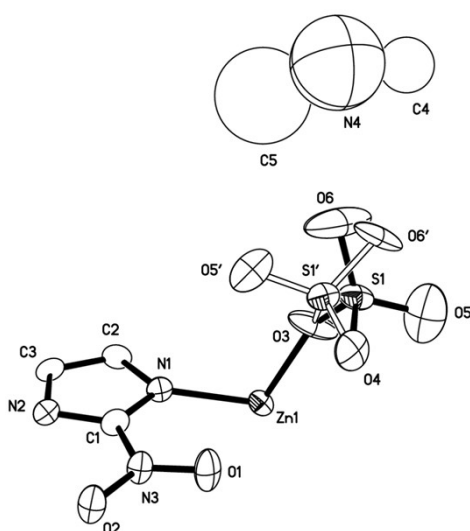

**Figure S4.** An ORTEP drawing of the asymmetric unit of **MISF-2**. The thermal ellipsoids are displayed at 50% probability level. Hydrogen atoms are not shown for simplicity. The sulphate ion is disordered over two sites with equal probability, respectively. The dimethyl ammonium cation was severely disordered and a proper disordered model could not be applied. Therefore, the thermal parameters of the C and N atoms of the dimethylammonium ion were refined isotropically.



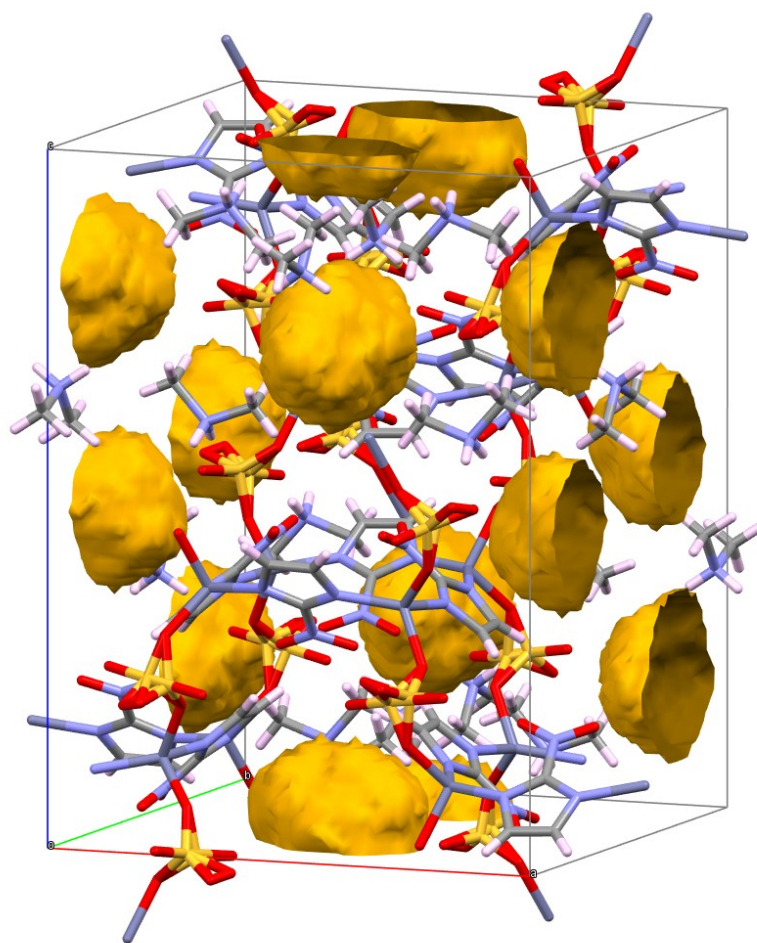

**Figure S5.** The isolate small pores in the unit cell of **MISF-2** calculated and drawn by Mercury 2020.2.0 (Build 290188).

**Table S5.** Crystal data and refinement results for **MISF-3**

|                                 |                                             |                           |
|---------------------------------|---------------------------------------------|---------------------------|
| Empirical formula               | $C_{19}H_{26}N_{13}O_{17}S_2Zn_{3.5}$       |                           |
| Formula weight                  | 1001.44                                     |                           |
| Temperature                     | 173 (2) K                                   |                           |
| Wavelength                      | 0.700 Å                                     |                           |
| Crystal system                  | Monoclinic                                  |                           |
| Space group                     | $C2/c$ (No. 15)                             |                           |
| Unit cell dimensions            | $a = 24.841(5)$ Å                           | $\alpha = 90^\circ$ .     |
|                                 | $b = 14.724(3)$ Å                           | $\beta = 102.79(3)^\circ$ |
|                                 | $c = 20.723(4)$ Å                           | $\gamma = 90^\circ$ .     |
| Volume                          | $7392(3)$ Å <sup>3</sup>                    |                           |
| Z                               | 8                                           |                           |
| Density (calculated)            | 1.803 g/cm <sup>3</sup>                     |                           |
| Absorption coefficient          | 2.440 mm <sup>-1</sup>                      |                           |
| F(000)                          | 4048                                        |                           |
| Crystal size                    | 0.099 x 0.094 x 0.094 mm <sup>3</sup>       |                           |
| Theta range for data collection | 1.594 to 27.817°                            |                           |
| Index ranges                    | -33 ≤ h ≤ 33, -18 ≤ k ≤ 18, -27 ≤ l ≤ 27    |                           |
| Reflections collected           | 17368                                       |                           |
| Independent reflections         | 8885 [R(int) = 0.0320]                      |                           |
| Completeness to theta = 24.835° | 97.7 %                                      |                           |
| Absorption correction           | Empirical                                   |                           |
| Max. and min. transmission      | 1.000 and 0.452                             |                           |
| Refinement method               | Full-matrix least-squares on F <sup>2</sup> |                           |
| Data / restraints / parameters  | 8885 / 33 / 496                             |                           |
| Goodness-of-fit on F2           | 1.078                                       |                           |
| Final R indices [I > 2σ(I)]     | R1 = 0.0750, wR2 = 0.2241                   |                           |
| R indices (all data)            | R1 = 0.1090, wR2 = 0.2467                   |                           |
| Extinction coefficient          | 0.00152(18)                                 |                           |
| Largest diff. peak and hole     | 1.685 and -1.366 e.Å <sup>-3</sup>          |                           |

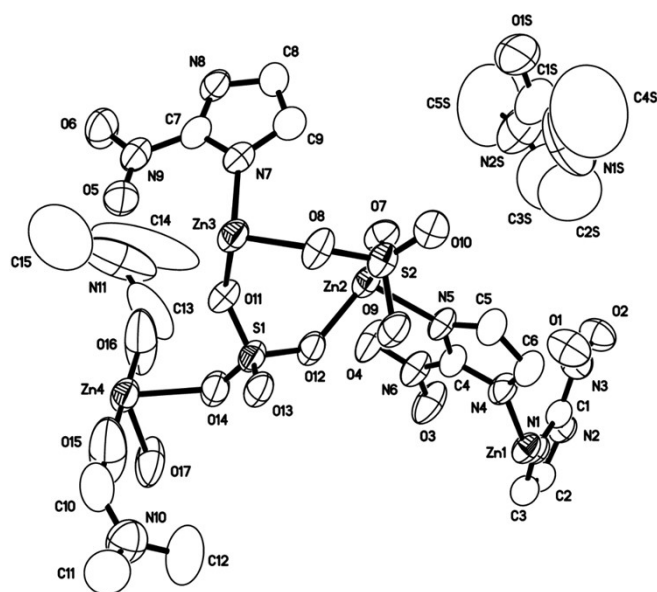**Figure S6.** An ORTEP drawing of the asymmetric unit of **MISF-3**. The thermal ellipsoids are displayed at 50% probability level. Hydrogen atoms are not shown for simplicity. The two DMI molecules coordinated to Zn4 sit on a special position and thus half of them are shown in the asymmetric unit.

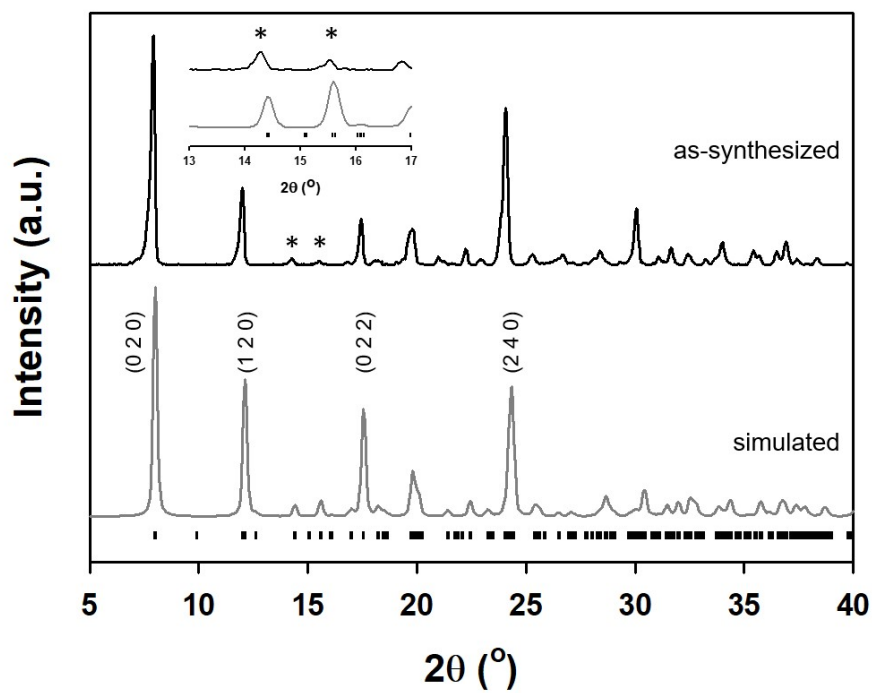

**Figure S7.** The measured and simulated PXRD patterns for **MISF-1**. The inset is enlarged display for the as-synthesized (top) and simulated (bottom) patterns between  $13^\circ$  and  $17^\circ$ .

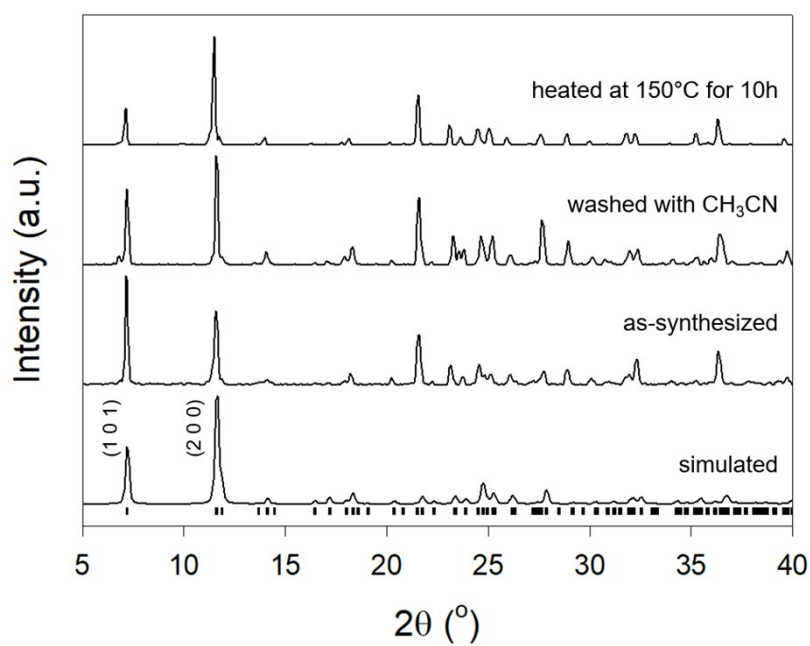

**Figure S8.** The measured and simulated PXRD patterns for **MISF-2**.

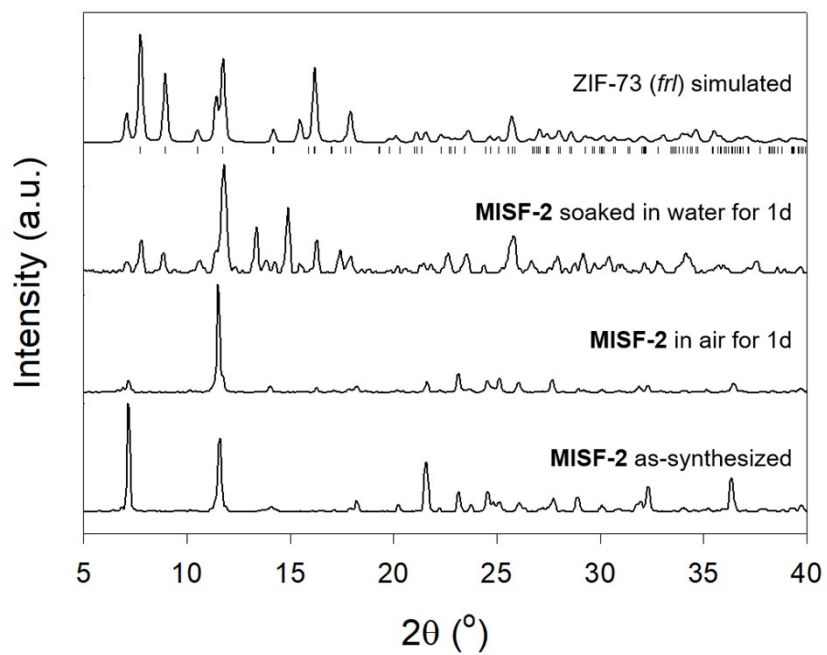

**Figure S9.** The PXRD patterns of **MISF-2** samples. The chemical composition of the solid obtained when **MISF-2** is soaked in water for 1 d gave elemental analysis results as follows. Found (%):C, 24.95; H, 1.35; N, 36.35; S, 0.

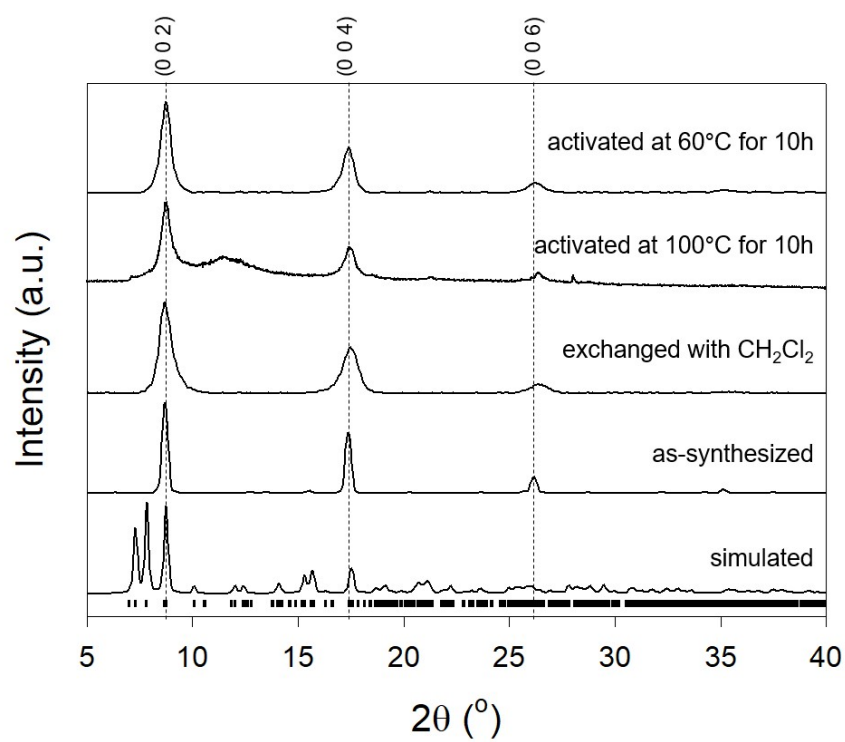

(a)

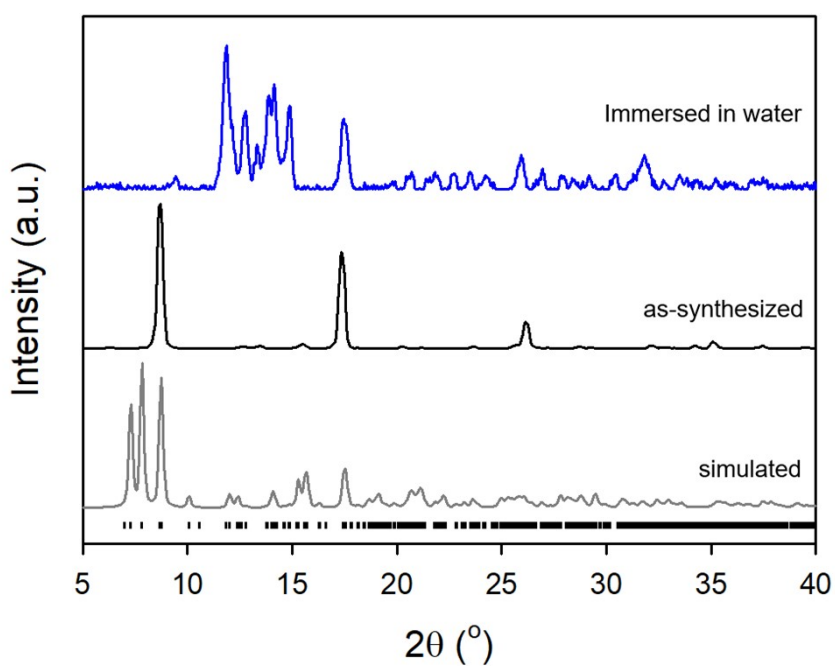

(b)

**Figure S10.** The PXRD patterns for **MISF-3** samples: (a) the activated samples are compared to the as-synthesized one, where the simulated pattern was generated using the X-ray structure.

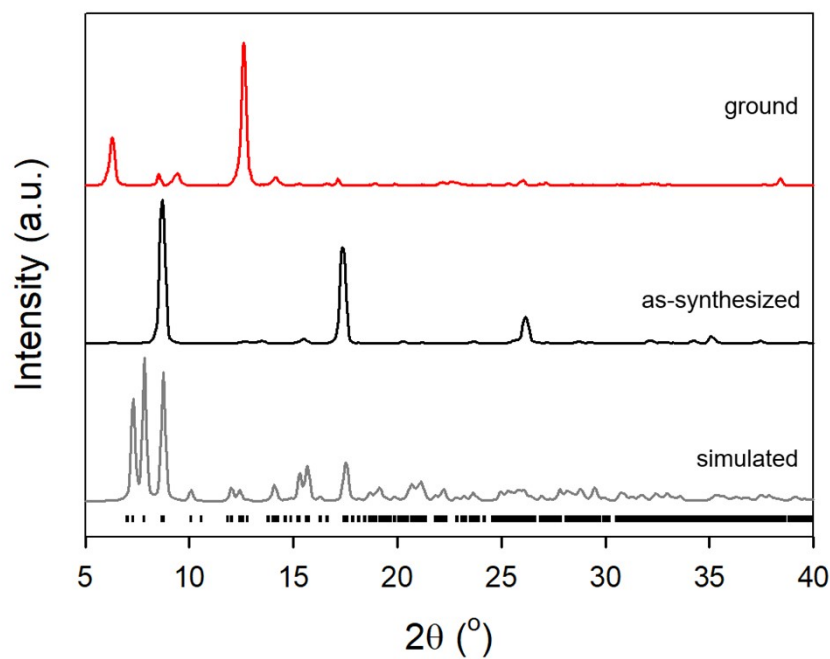

(c)

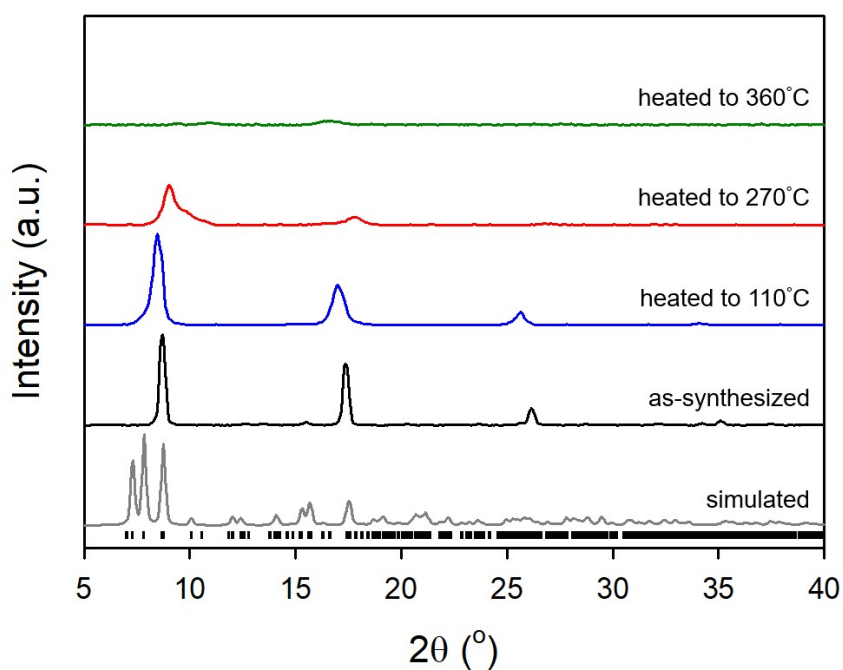

(d)

**Figure S10.** The PXRd patterns for **MISF-3** samples (c) ground in air for about 5 min, and (d) heated at a TGA apparatus at ambient atmosphere up to 110 °C, 270 °C, and 360 °C, respectively. Elemental analysis results are as follows. Found (%) for the 110 °C sample: C, 25.76; H, 3.2; N, 22.79; S, 5.63. For the 270 °C sample, found (%): C, 19.91; H, 2.2; N, 21.07; S, 7.11. For the 360 °C sample, found (%): C, 15.93; H, 1.58; N, 19.85; S, 8.82.

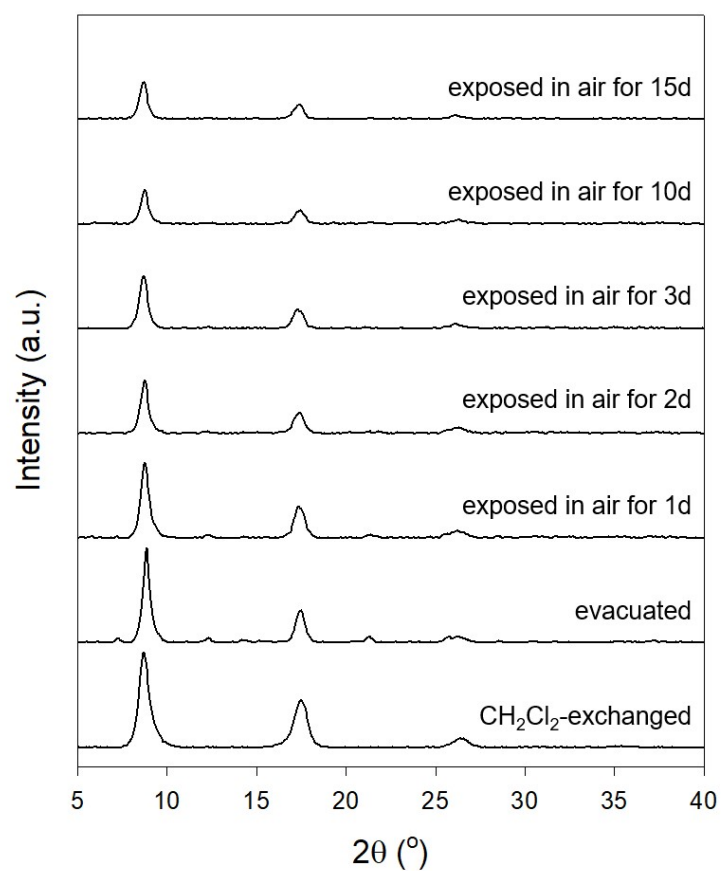

**Figure S11.** The PXRD patterns for **MISF-3** when evacuated samples are exposed in air up to 15 days. Each PXRD pattern was measured with almost the same quantity of samples to monitor the decrease in peak intensity.

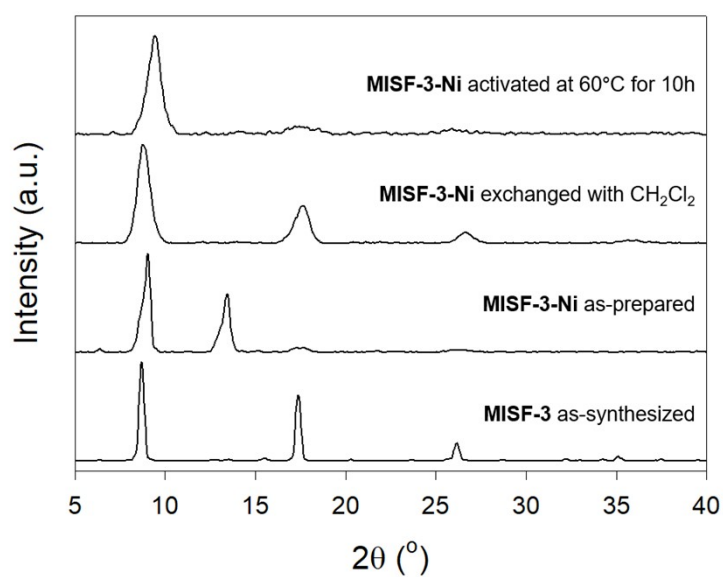

**Figure S12.** The PXRD patterns for **MISF-3-Ni** samples.

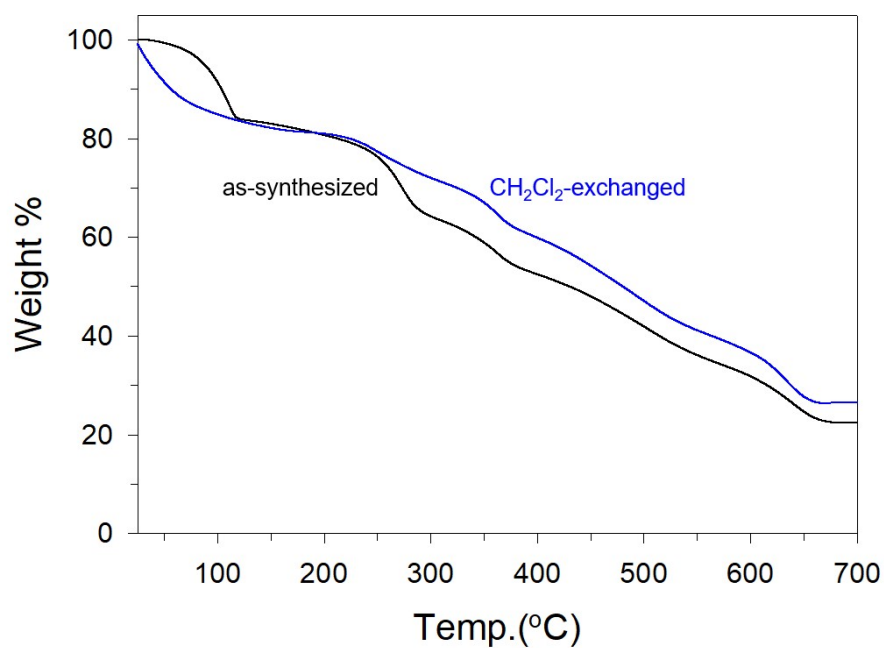

(a)

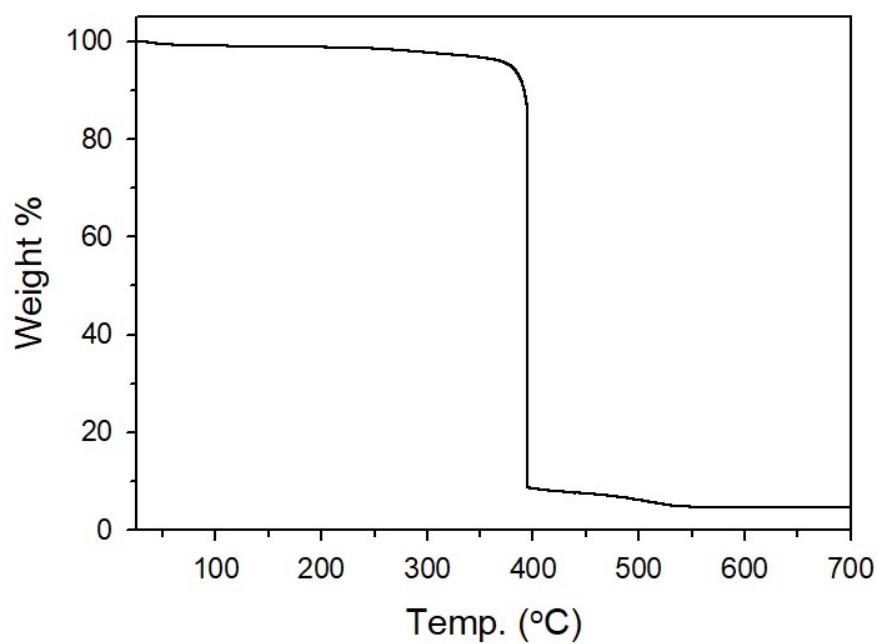

(b)

**Figure S13.** The TGA curves for **MISF-3** samples: (a) as-synthesized and solvent-exchanged samples and (b) a pale-yellow powder produced immediately when MISF-3 is immersed in water. The elemental analysis for the pale-yellow powder: found(%): C, 24.99; H, 1.40; N, 36.19; S, 0.



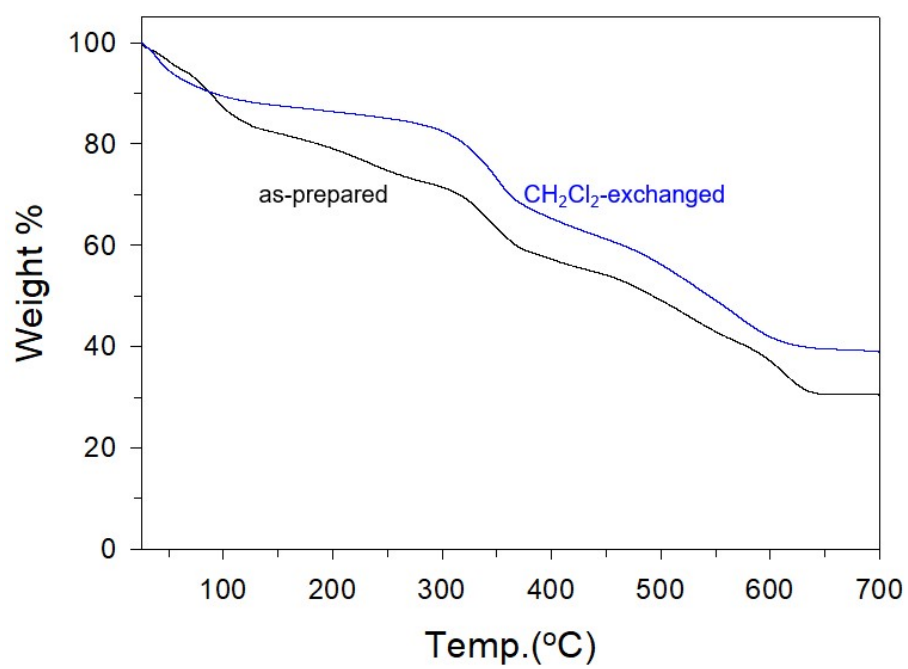

Figure S14. The TGA curves for MISF-3-Ni samples.

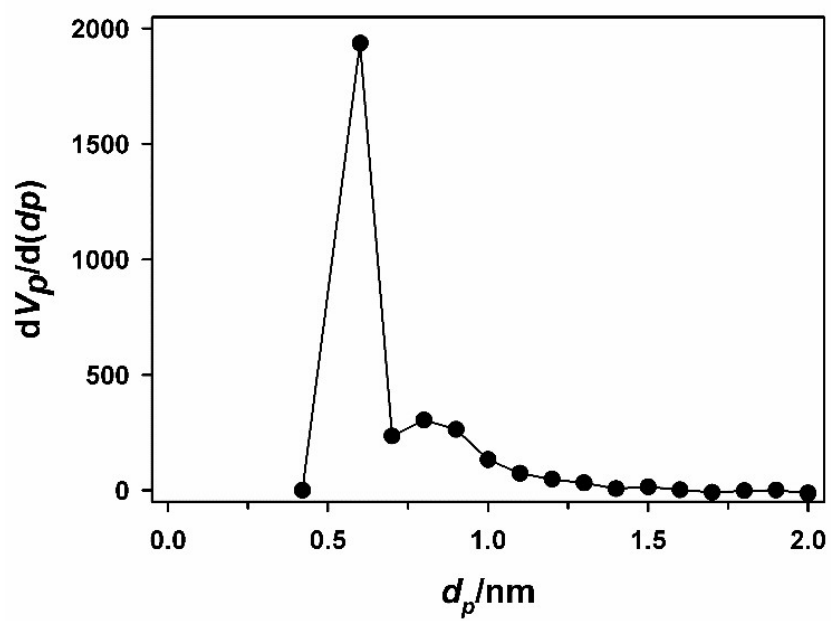

Figure S15. The pore size distribution of MIS-3.

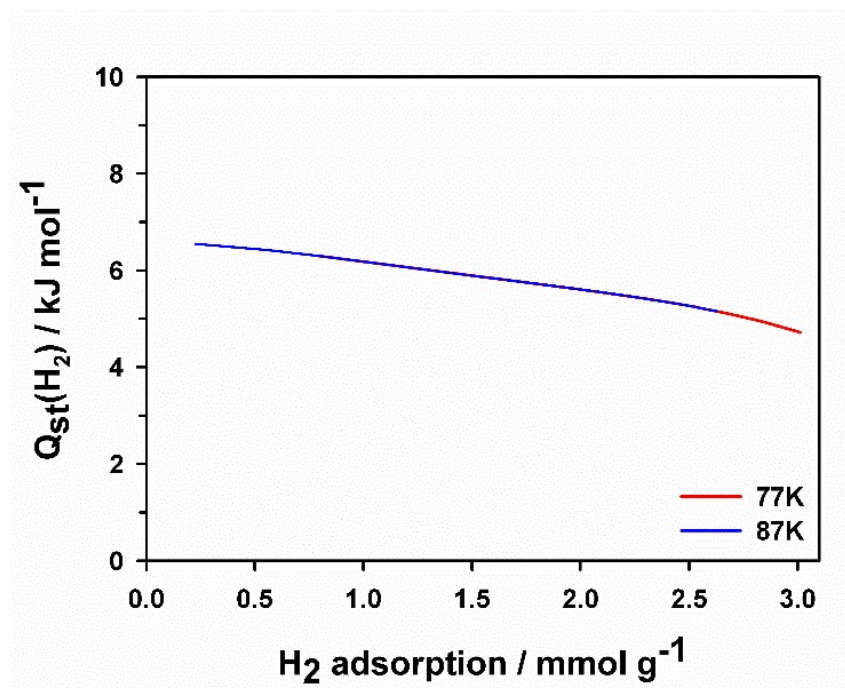

Figure S16. The isosteric heat of H<sub>2</sub> adsorption for MISF-3.

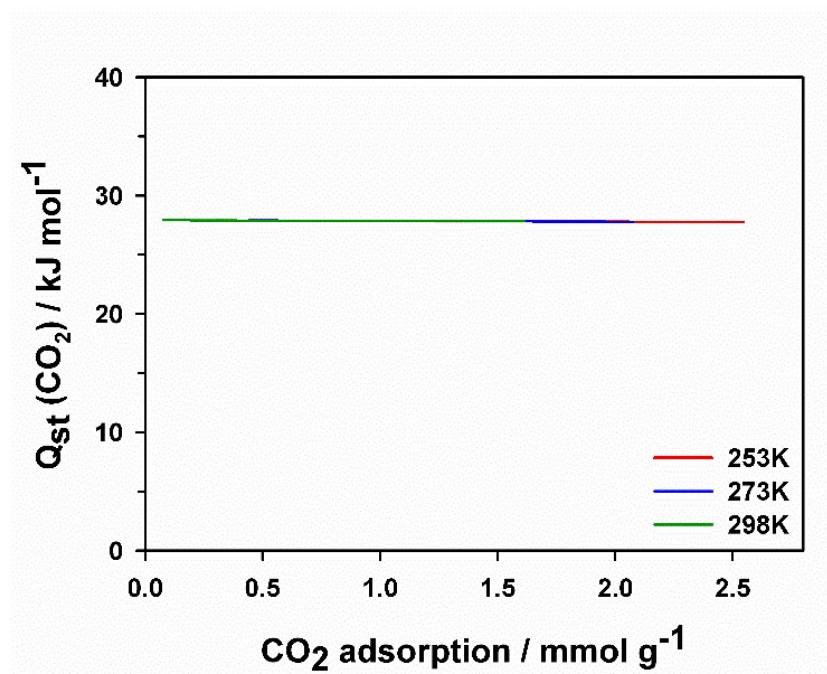

Figure S17. The isosteric heat of CO<sub>2</sub> adsorption for MISF-3.

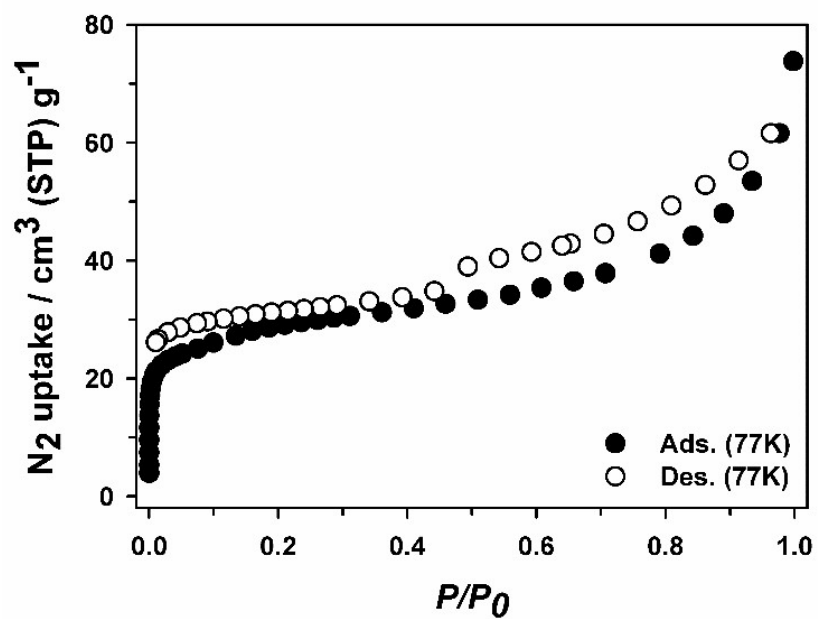

Figure S18. The  $\text{N}_2$  adsorption-desorption isotherm of **MISF-3-Ni** measured at 77 K.

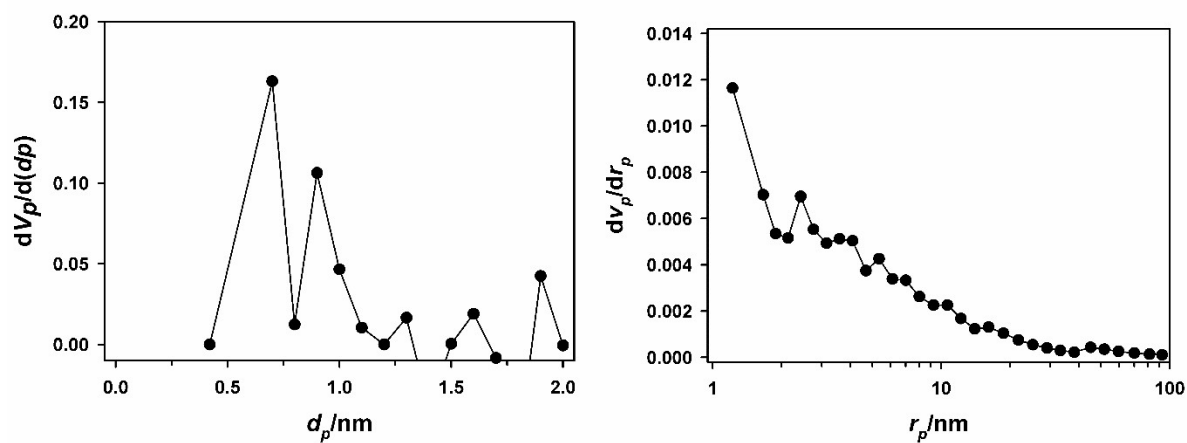

Figure S19. The pore size distribution of **MISF-3-Ni**.

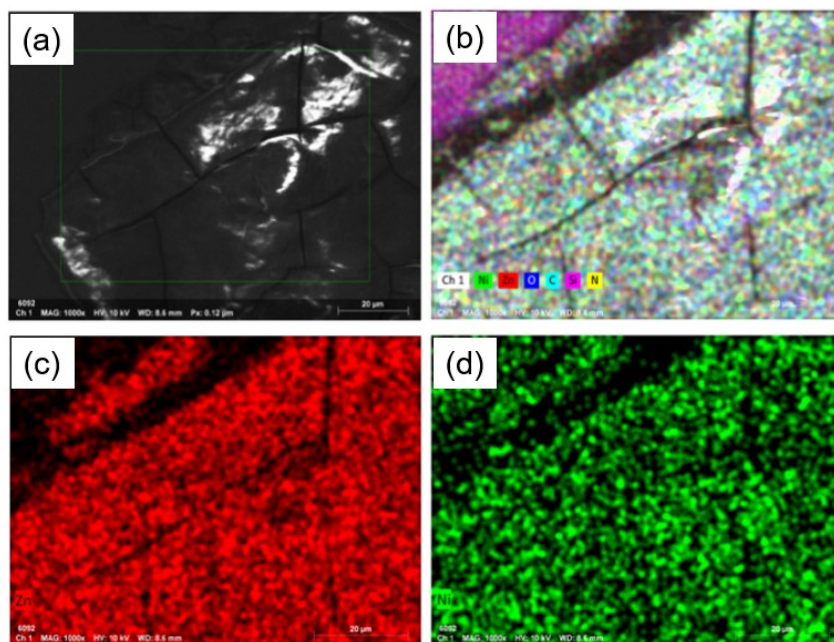

**Figure S20.** The SEM and energy dispersive X-ray elemental mapping images of a **MISF-3-Ni** crystal: (a) the mapping area on a crystal surface, the mapping of Ni, Zn, O, C, Si, and N, (c) Zn, and (d) Ni.

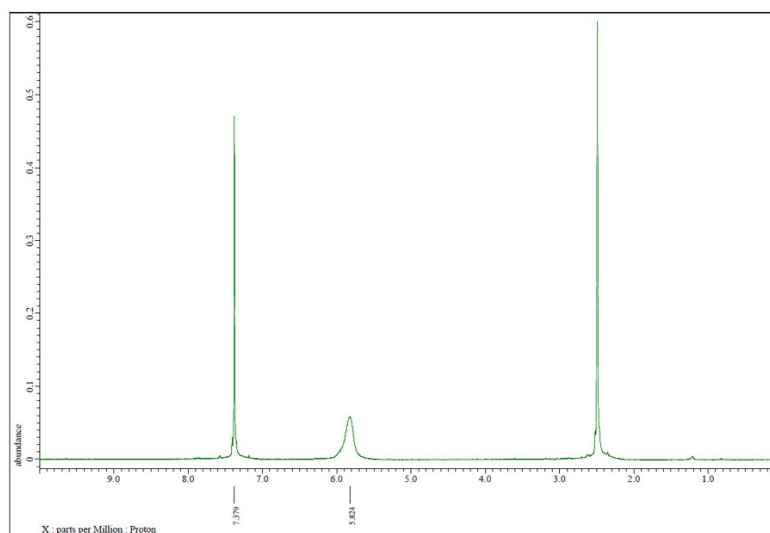

**Figure S21.**  $^1\text{H}$ -NMR spectrum for the pale-yellow solid obtained by immersing **MISF-3** in water. The solid was dissolved in  $\text{DCl}/\text{DMSO}-d_6$ . Only the 2-methylimidazole at 7.339 ppm was observed except for the water and DMSO signals.

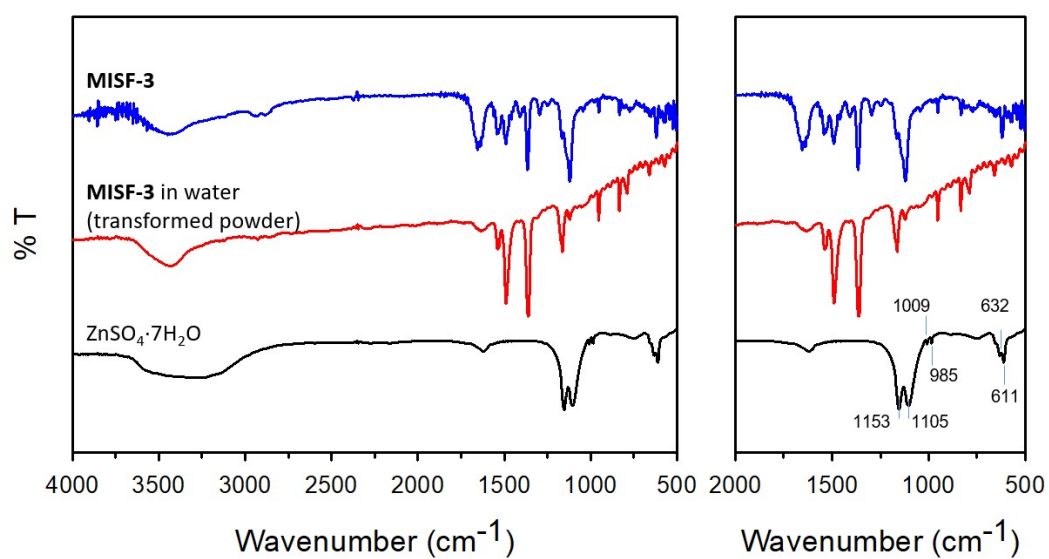

**Figure S22.** FT-IR spectrum for the pale-yellow solid (or transformed powder) obtained by immersing **MISF-3** in water, **MISF-3**, and  $\text{ZnSO}_4 \cdot 7\text{H}_2\text{O}$  (reference). The wavenumbers in the spectrum are given for the sulphate bands.

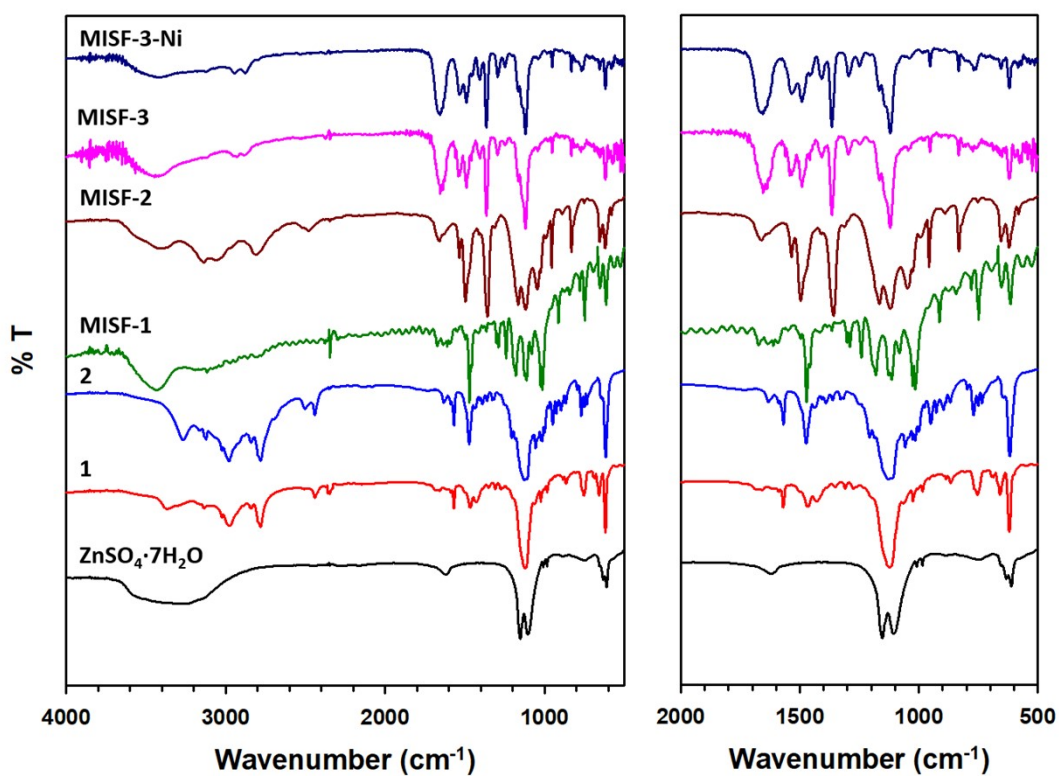

**Figure S23.** FT-IR spectra for the compounds in this work and  $\text{ZnSO}_4 \cdot 7\text{H}_2\text{O}$  (reference).
